# Supplementary material for: Role of the FeOxsupport in constructing high-performance Pt/FeOxcatalysts for low-temperature CO oxidation
Source: Royal Society of Chemistry journal article supplement (doi:10.1039/c5cy00840a), 2015-10-08
Supplement: c5cy00840a1.pdf [file c5cy00840a1.pdf]

## Supporting information

### **Role of FeO<sub>x</sub> support in constructing high performance Pt/FeO<sub>x</sub> catalyst for low-temperature CO oxidation**

Bin Zheng,<sup>a</sup> Gang Liu\*,<sup>a</sup> Longlong Geng,<sup>a</sup> Junyan Cui,<sup>a</sup> Shujie Wu,<sup>a</sup> Ping Wu,<sup>a</sup> Mingjun Jia,<sup>a</sup> Wenfu Yan<sup>b</sup>  
and Wenxiang Zhang\*<sup>a</sup>

<sup>a</sup> Key Laboratory of Surface and Interface Chemistry of Jilin Province, College of Chemistry, Jilin University, Changchun, 130012, China

<sup>b</sup> State Key Laboratory of Inorganic Synthesis and Preparative Chemistry, College of Chemistry, Jilin University, Changchun, 130012, China

\*Email: lgang@jlu.edu.cn (Gang Liu), zhwenx@jlu.edu.cn (Wenxiang Zhang)

Tel: (+86)431-85155390 Fax: (+86)431-88499140

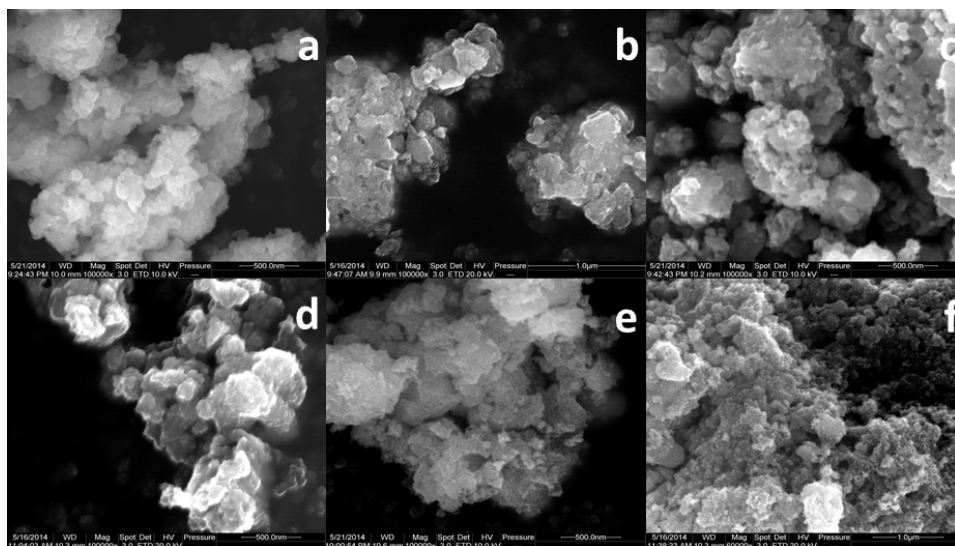

**Fig. S1** SEM images of FeO<sub>x</sub> supports: (a) FeO<sub>x</sub>-100, (b) FeO<sub>x</sub>-130, (c) FeO<sub>x</sub>-220, (d) FeO<sub>x</sub>-300, (e) FeO<sub>x</sub>-430 and (f) FeO<sub>x</sub>-500.

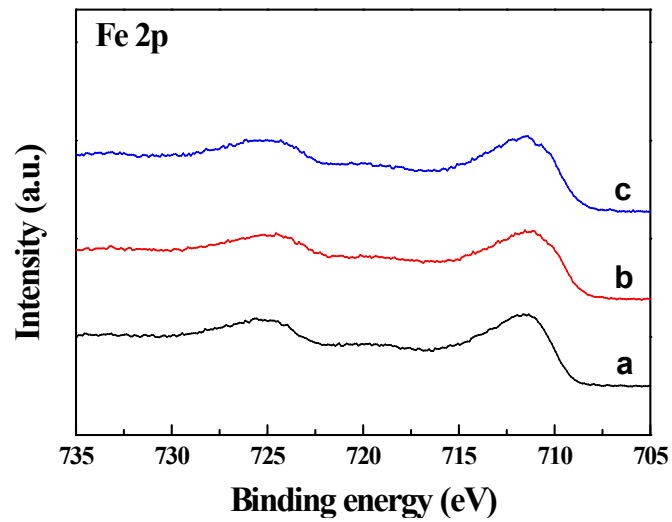

**Fig. S2** Fe 2p XPS spectrum of FeO<sub>x</sub> supports: (a) FeO<sub>x</sub>-100, (b) FeO<sub>x</sub>-300, (c) FeO<sub>x</sub>-500.

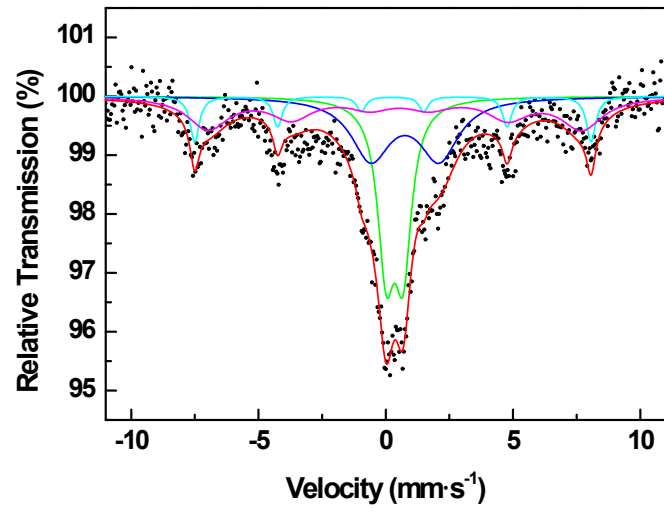

**Fig. S3** Mössbauer spectrum of the Pt/FeO<sub>x</sub>-100 sample at 298 K.

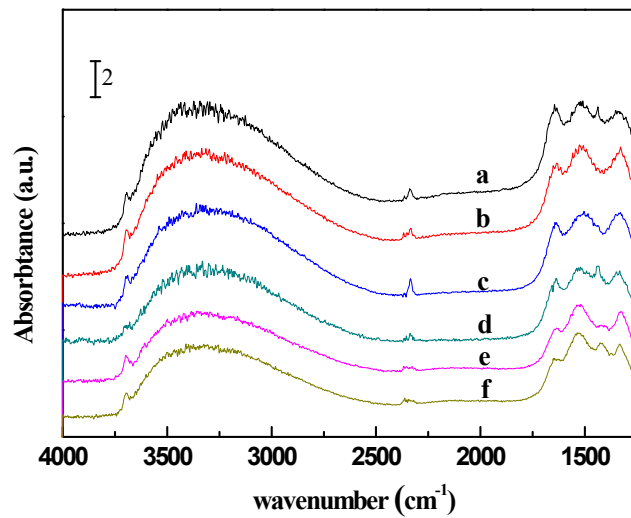

**Fig. S4** DRIFT spectra of Pt/FeO<sub>x</sub> catalysts: (a) Pt/FeO<sub>x</sub>-100, (b) Pt/FeO<sub>x</sub>-130, (c) Pt/FeO<sub>x</sub>-220, (d) Pt/FeO<sub>x</sub>-300, (e) Pt/FeO<sub>x</sub>-430 and (f) Pt/FeO<sub>x</sub>-500.

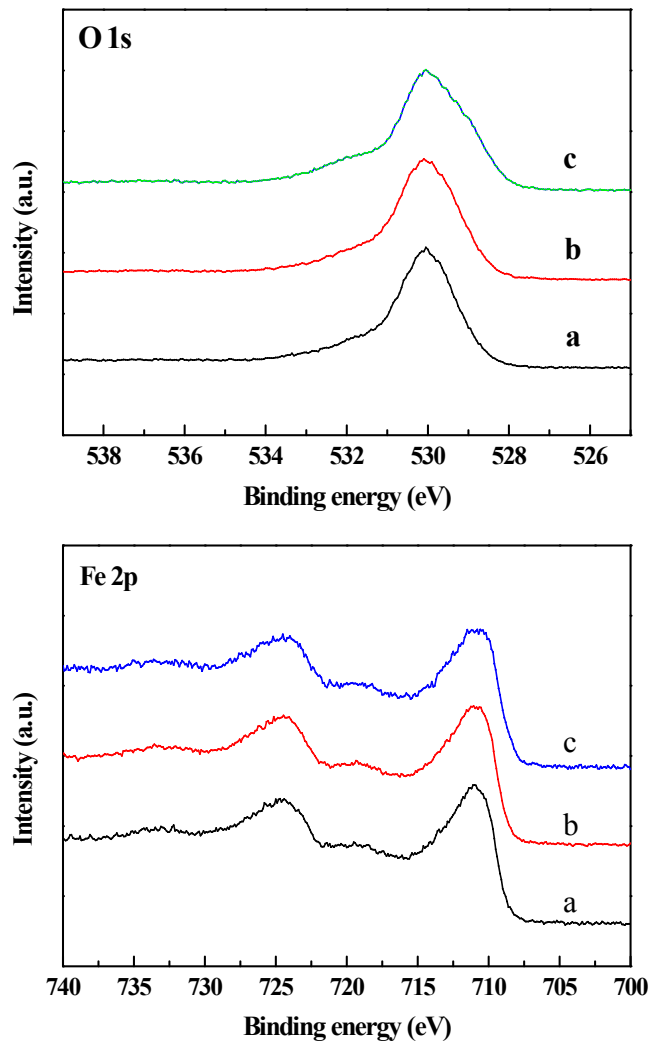

**Fig. S5** O 1s and Fe 2p XPS spectra of Pt/FeO<sub>x</sub> catalysts: (a) Pt/FeO<sub>x</sub>-100, (b) Pt/FeO<sub>x</sub>-300, (c) Pt/FeO<sub>x</sub>-500.

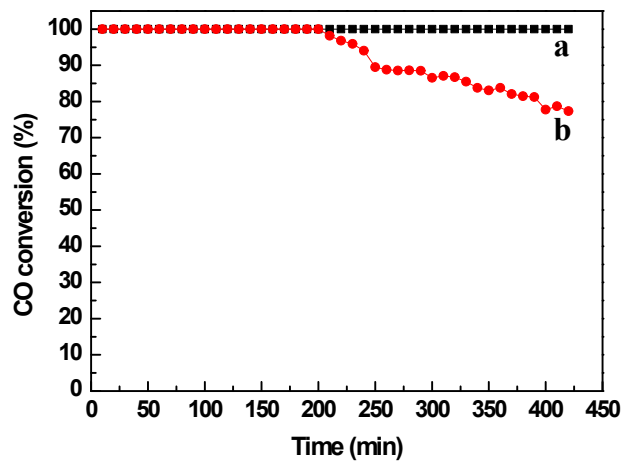

**Fig. S6** CO catalytic oxidation activities of (a) Pt/FeO<sub>x</sub>-100 in the presence of water vapour and (b) Pt/FeO<sub>x</sub>-100 under dry condition. Reaction conditions were as follows: room temperature 0.5% CO, 10% O<sub>2</sub>/Ar balance, space velocity: 120000 mL·g<sup>-1</sup>·h<sup>-1</sup>.

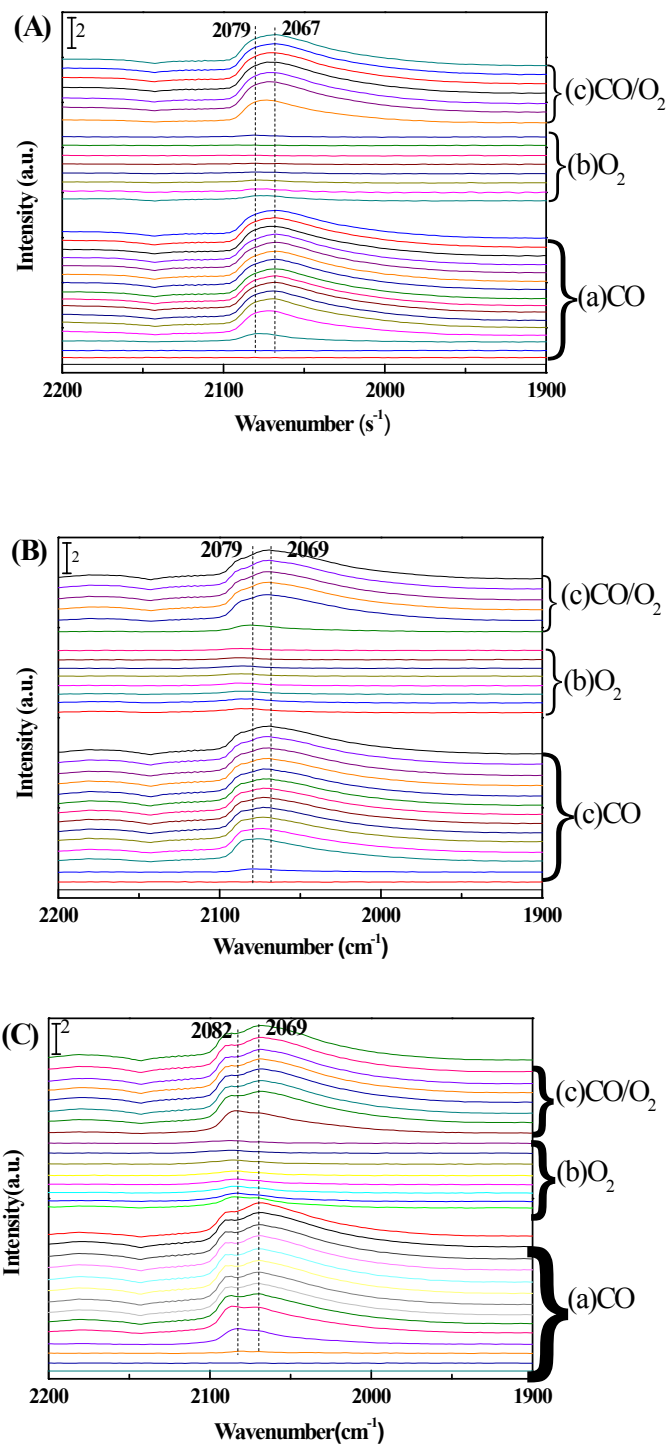

**Fig. S7** In situ DRIFT spectra ranging from 2200 to 1900  $cm^{-1}$  of iron oxide supported Pt catalysts: (A) Pt/FeOx-100, (B) Pt/FeOx-300, (C) Pt/FeOx-500 as a function of time after the gas flow was



switched (a) from Ar to 1% CO/Ar, (b) from 1% CO/Ar to 20% O<sub>2</sub>/ Ar, and (c) from 20% O<sub>2</sub>/Ar to CO/O<sub>2</sub> at room temperature. Each spectrum was recorded with an interval of 40 s.

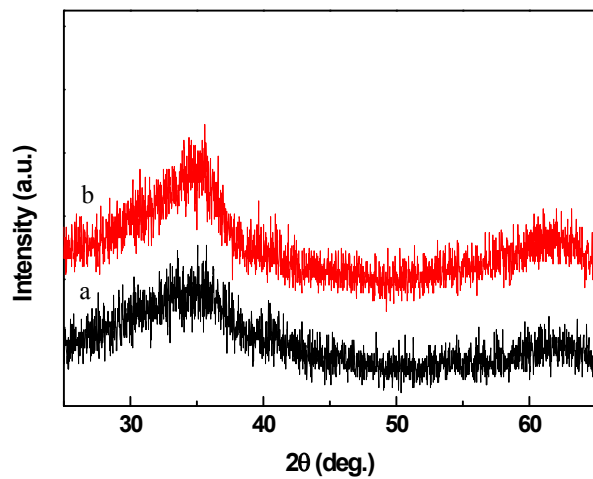

**Fig. S8** XRD patterns of  $\text{FeO}_x$  supports: (a)  $\text{FeO}_x$ -100, (b)  $\text{FeO}_x$ -100 treated at 100 °C for 3 h.

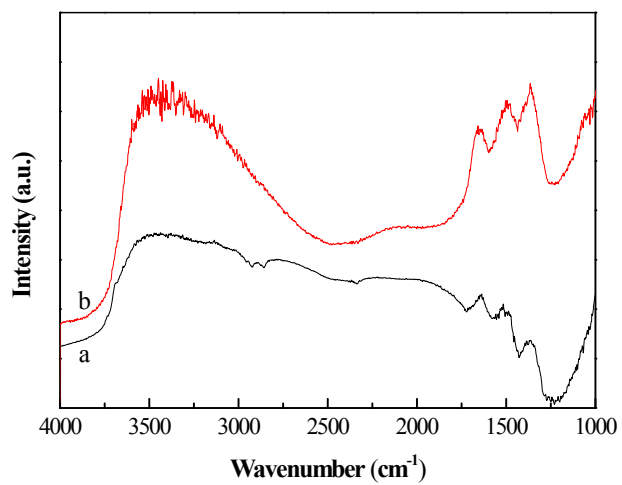

**Fig. S9** DRIFT spectra of FeO<sub>x</sub> supports: (a) FeO<sub>x</sub>-100, (b) FeO<sub>x</sub>-100 treated at 100 °C for 3 h.

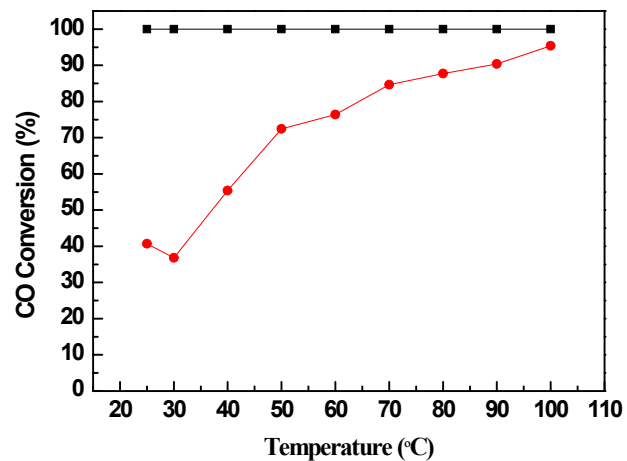

**Fig. S10** CO oxidation activities of (a) Pt/FeO<sub>x</sub>-100 and (b) Pt/FeO<sub>x</sub>-100(treated at 100 °C for 3 h). Reaction conditions: 0.5% CO, 10% O<sub>2</sub>/Ar balance, space velocity: 120000 mL·g<sup>-1</sup>·h<sup>-1</sup>.

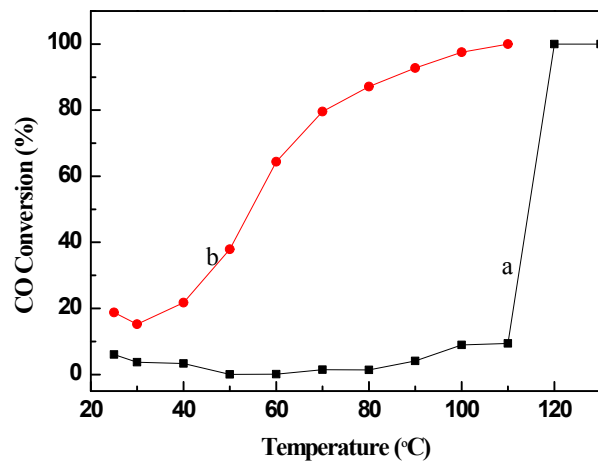

**Fig. S11** CO oxidation activities of (a) Pt/FeO<sub>x</sub>-500 and (b) Pt/FeO<sub>x</sub>-500 in the presence of water vapour. Reaction conditions: 0.5% CO, 10% O<sub>2</sub>/Ar balance, space velocity: 120000 mL·g<sup>-1</sup>·h<sup>-1</sup>.

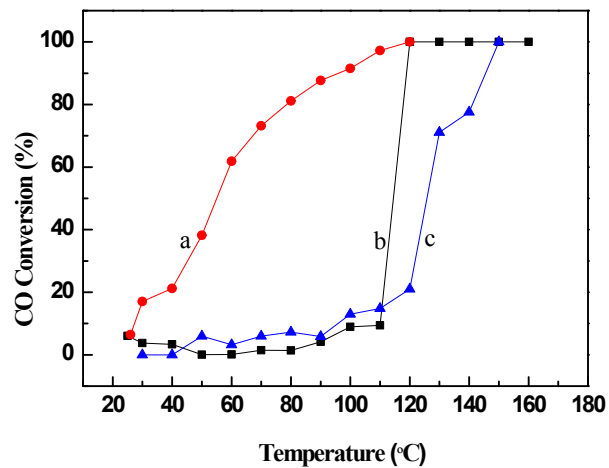

**Fig. S12** CO oxidation activities of (a) Pt/FeO<sub>x</sub>-500 with reductive treatment, (b) Pt/FeO<sub>x</sub>-500, (c) Pt/FeO<sub>x</sub>-500 with oxidative treatment. Reaction conditions: 0.5% CO, 10% O<sub>2</sub>/Ar balance, space velocity: 120000 mL·g<sup>-1</sup>·h<sup>-1</sup>.

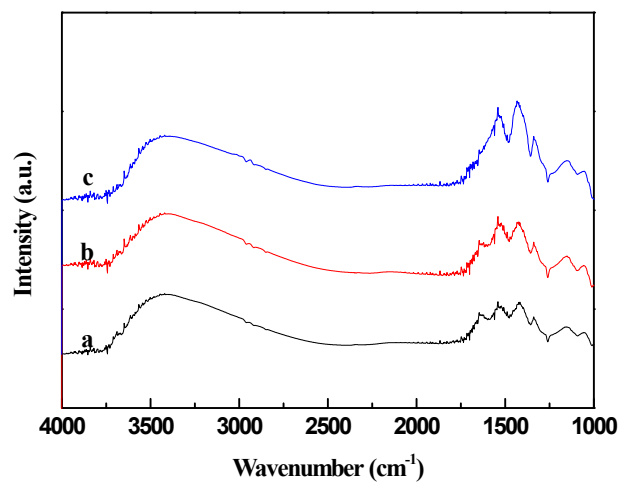

**Fig. S13** DRIFT spectra of (a) Pt/FeO<sub>x</sub>-500 with reductive treatment, (b) Pt/FeO<sub>x</sub>-500, (c) Pt/FeO<sub>x</sub>-500 with oxidative treatment.

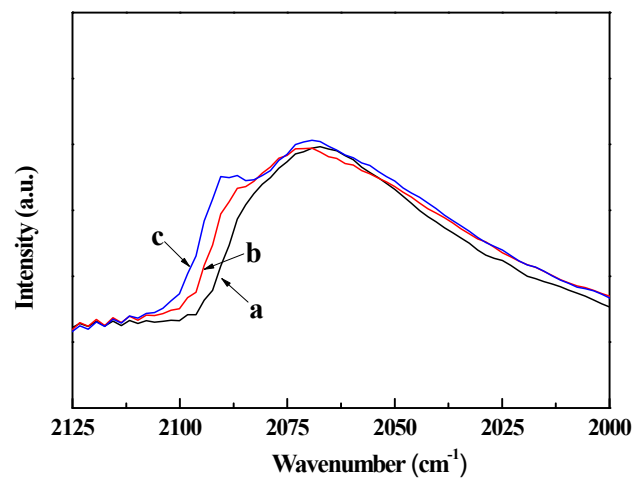

**Fig. S14** In situ DRIFT spectra of Pt/FeO<sub>x</sub> catalysts as a function of adsorbing saturated CO: (a) Pt/FeO<sub>x</sub>-100, (b) Pt/FeO<sub>x</sub>-300, and (c) Pt/FeO<sub>x</sub>-500.



**Table S1** Texture properties of FeO<sub>x</sub> supports.

| Supports              | S <sub>BET</sub> (m <sup>2</sup> ·g <sup>-1</sup> ) | Pore Volume<br>(cm <sup>3</sup> ·g <sup>-1</sup> ) | Pore Size <sup>a</sup><br>(nm) |
|-----------------------|-----------------------------------------------------|----------------------------------------------------|--------------------------------|
| FeO <sub>x</sub> -100 | 185                                                 | 0.22                                               | 4.5                            |
| FeO <sub>x</sub> -130 | 195                                                 | 0.25                                               | 4.7                            |
| FeO <sub>x</sub> -220 | 178                                                 | 0.23                                               | 4.9                            |
| FeO <sub>x</sub> -300 | 118                                                 | 0.23                                               | 7.5                            |
| FeO <sub>x</sub> -430 | 43                                                  | 0.18                                               | 16.8                           |
| FeO <sub>x</sub> -500 | 41                                                  | 0.16                                               | 18.5                           |

<sup>a</sup> Average pore diameters calculated from adsorption branches using BJH model.

**Table S2** H<sub>2</sub> consumption of FeO<sub>x</sub> calculated from H<sub>2</sub>-TPR profiles.

| Iron oxides           | H <sub>2</sub> consumption of the first peak (mmol·g <sup>-1</sup> ) | H <sub>2</sub> consumption of the second peak (mmol·g <sup>-1</sup> ) | H <sub>2</sub> consumption of the third peak (mmol·g <sup>-1</sup> ) | Total H <sub>2</sub> consumption (mmol·g <sup>-1</sup> ) |
|-----------------------|----------------------------------------------------------------------|-----------------------------------------------------------------------|----------------------------------------------------------------------|----------------------------------------------------------|
| FeO <sub>x</sub> -100 | 0.84                                                                 | 2.25                                                                  | 5.17                                                                 | 8.26                                                     |
| FeO <sub>x</sub> -130 | 1.78                                                                 | 3.53                                                                  | 5.56                                                                 | 10.87                                                    |
| FeO <sub>x</sub> -220 | 2.82                                                                 | 4.46                                                                  | 5.77                                                                 | 13.04                                                    |
| FeO <sub>x</sub> -300 | 4.07                                                                 | 6.43                                                                  | 5.58                                                                 | 16.07                                                    |
| FeO <sub>x</sub> -430 | 2.42                                                                 | 9.39                                                                  | 6.67                                                                 | 18.48                                                    |
| FeO <sub>x</sub> -500 | 2.64                                                                 | 10.00                                                                 | 6.33                                                                 | 18.97                                                    |

**Table S3** Texture properties of Pt/FeO<sub>x</sub> catalysts.

| Catalysts                | S <sub>BET</sub> (m <sup>2</sup> ·g <sup>-1</sup> ) | Pore Volume<br>(cm <sup>3</sup> ·g <sup>-1</sup> ) | Pore Size <sup>a</sup><br>(nm) |
|--------------------------|-----------------------------------------------------|----------------------------------------------------|--------------------------------|
| Pt/FeO <sub>x</sub> -100 | 163                                                 | 0.28                                               | 6.5                            |
| Pt/FeO <sub>x</sub> -130 | 131                                                 | 0.26                                               | 7.7                            |
| Pt/FeO <sub>x</sub> -220 | 147                                                 | 0.27                                               | 7.0                            |
| Pt/FeO <sub>x</sub> -300 | 107                                                 | 0.23                                               | 8.4                            |
| Pt/FeO <sub>x</sub> -430 | 48                                                  | 0.18                                               | 14.7                           |
| Pt/FeO <sub>x</sub> -500 | 41                                                  | 0.18                                               | 17.3                           |

<sup>a</sup> Average pore diameters calculated from adsorption branches using BJH model.

**Table S4** High fine parameters of the fitted curves to the Mössbauer spectra.

| sample                   | Multiplet  | IS<br>mm s <sup>-1</sup> | QS<br>mm s <sup>-1</sup> | Hf<br>kOe | Peak area<br>(%) | Assignment                     |
|--------------------------|------------|--------------------------|--------------------------|-----------|------------------|--------------------------------|
| Pt/FeO <sub>x</sub> -100 | Doublet I  | 0.39±0.01                | 0.67±0.02                |           | 31.3             | amorphous<br>ferrihydrite      |
|                          | Doublet II | 0.80±0.08                | 2.68±0.04                |           | 28.0             | Fe <sup>2+</sup>               |
|                          | Sextet I   | 0.32±0.02                | 0.02±0.04                | 482.8±1   | 9.9              | Fe <sub>3</sub> O <sub>4</sub> |
|                          | Sextet II  | 0.50±0.04                | 0.18±0.01                | 455.0±4   | 30.8             | Fe <sub>3</sub> O <sub>4</sub> |

IS: the isomer shift relative to  $\alpha$ -Fe at room temperature; QS: the quadrupole shift; Hf: the magnetic hyperfine field at <sup>57</sup>Fe nuclei.

**Table S5** H<sub>2</sub> consumption of Pt/FeO<sub>x</sub> catalysts calculated from H<sub>2</sub>-TPR profiles.

| Catalysts                | H <sub>2</sub> consumption of the first peak (mmol·g <sup>-1</sup> ) | H <sub>2</sub> consumption of the second peak (mmol·g <sup>-1</sup> ) | H <sub>2</sub> consumption of the third peak (mmol·g <sup>-1</sup> ) | Total H <sub>2</sub> consumption (mmol·g <sup>-1</sup> ) |
|--------------------------|----------------------------------------------------------------------|-----------------------------------------------------------------------|----------------------------------------------------------------------|----------------------------------------------------------|
| Pt/FeO <sub>x</sub> -100 | 1.04                                                                 | 1.34                                                                  | 4.31                                                                 | 6.69                                                     |
| Pt/FeO <sub>x</sub> -130 | 0.77                                                                 | 1.78                                                                  | 5.23                                                                 | 7.78                                                     |
| Pt/FeO <sub>x</sub> -220 | 0.40                                                                 | 2.69                                                                  | 4.22                                                                 | 7.31                                                     |
| Pt/FeO <sub>x</sub> -300 | 0.31                                                                 | 5.67                                                                  | 4.15                                                                 | 10.13                                                    |
| Pt/FeO <sub>x</sub> -430 | 0.00                                                                 | 10.55                                                                 | 4.37                                                                 | 14.92                                                    |
| Pt/FeO <sub>x</sub> -500 | 0.00                                                                 | 10.46                                                                 | 4.40                                                                 | 14.86                                                    |
